# Supplementary material for: Within-Household Selection in Mail Surveys
Source: Oxford University Press journal article supplement (doi:10.1093/poq/nfx025), 2017-01-01
Supplement: nfx025_suppl_poq_16_0133_File005.xlsx [file nfx025_suppl_poq_16_0133_File005.xlsx]

## Sheet: Sheet1
	Overall								No Instruction								Instruction								Verification Question								Test for Differences in Respondent Pools Across Treatments
	Overall		Nonrespondents		Respondents		|Respondents - Nonrespondents|		Overall		Nonrespondents		Respondents		|Respondents - Nonrespondents|		Overall		Nonrespondents		Respondents		|Respondents - Nonrespondents|		Overall		Nonrespondents		Respondents		|Respondents - Nonrespondents|
	n	%	n	%	n	%			n	%	n	%	n	%			n	%	n	%	n	%			n	%	n	%	n	%
Census Divisions
Division 1: New England	284	0.0473333	235	0.0469812	49	0.0490982	0.00211699		100	0.05	80	0.0486322	20	0.056338	0.00770581		88	0.044	77	0.0460802	11	0.0334347	0.0126455		96	0.048	78	0.0462633	18	0.0573248	0.0110615
Division 2: Middle Atlantic	765	0.1275	627	0.12535	138	0.138277	0.0129267		271	0.1355	214	0.130091	57	0.160563	0.0304722		236	0.118	192	0.114901	44	0.133739	0.0188373		258	0.129	221	0.131079	37	0.117834	0.0132451
Division 3: East North Central	935	0.155833	757	0.151339	178	0.178357	0.0270172		310	0.155	250	0.151976	60	0.169014	0.0170384		298	0.149	239	0.143028	59	0.179331	0.0363032		327	0.1635	268	0.158956	59	0.187898	0.028942
Division 4: West North Central	416	0.0693333	330	0.0659736	86	0.0861723	0.0201987		140	0.07	106	0.0644377	34	0.0957746	0.031337		149	0.0745	121	0.0724117	28	0.0851064	0.0126947		127	0.0635	103	0.0610913	24	0.0764331	0.0153418
Division 5: South Atlantic	1246	0.207667	1046	0.209116	200	0.200401	0.00871555		396	0.198	339	0.206079	57	0.160563	0.0455156		428	0.214	355	0.212448	73	0.221884	0.00943686		422	0.211	352	0.208778	70	0.22293	0.0141518
Division 6: East South Central	381	0.0635	318	0.0635746	63	0.0631263	0.000448318		118	0.059	97	0.0589666	21	0.0591549	0.000188364		119	0.0595	99	0.059246	20	0.0607903	0.00154431		144	0.072	122	0.0723606	22	0.0700637	0.00229692
Division 7: West South Central	690	0.115	606	0.121152	84	0.0841683	0.0369832		230	0.115	200	0.121581	30	0.084507	0.0370735		237	0.1185	207	0.123878	30	0.0911854	0.0326925		223	0.1115	199	0.118031	24	0.0764331	0.0415977
Division 8: Mountain	416	0.0693333	353	0.0705718	63	0.0631263	0.00744552		137	0.0685	117	0.0711246	20	0.056338	0.0147866		139	0.0695	116	0.0694195	23	0.0699088	0.000489305		140	0.07	120	0.0711744	20	0.0636943	0.00748011
Division 9: Pacific	867	0.1445	730	0.145942	137	0.137275	0.00866707		298	0.149	242	0.147112	56	0.157746	0.010634		306	0.153	265	0.158588	41	0.12462	0.0339676		263	0.1315	223	0.132266	40	0.127389	0.00487718
Total	6000		5002		998				2000		1645		355				2000		1671		329				2000		1686		314
Chi Square	21.2623								14.6893								9.5301								8.01								13.1232
df	8								8								8								8								16
p-value	0.006								0.065								0.3								0.432								0.664
Nielsen County Size
A: County located in 25 largest US metropolitan areas	2379	0.3965	1995	0.39884	384	0.38477	0.0140709		800	0.4	661	0.401824	139	0.391549	0.0102744		778	0.389	654	0.391382	124	0.3769	0.0144827		801	0.4005	680	0.403321	121	0.38535	0.0179712
B: Not an A county, Pop'n>150000 or is part of metro area w/pop'n >150,000	1833	0.3055	1531	0.306078	302	0.302605	0.00347236		598	0.299	490	0.297872	108	0.304225	0.00635301		651	0.3255	553	0.33094	98	0.297872	0.0330672		584	0.292	488	0.289442	96	0.305732	0.01629
C: Pop'n between 40,000 and 150,000	916	0.152667	766	0.153139	150	0.150301	0.00283814		285	0.1425	235	0.142857	50	0.140845	0.00201207		299	0.1495	244	0.14602	55	0.167173	0.0211529		332	0.166	287	0.170225	45	0.143312	0.0269133
D: All other counties	872	0.145333	710	0.141943	162	0.162325	0.0203814		317	0.1585	259	0.157447	58	0.16338	0.00593347		272	0.136	220	0.131658	52	0.158055	0.026397		283	0.1415	231	0.137011	52	0.165605	0.0285944
Total	6000		5002		998				2000		1645		355				2000		1671		329				2000		1686		314
Chi Square	2.9703								0.1896								3.3027								3.1386								1.1298
df	3								3								3								3								6
p-value	0.412								0.979								0.347								0.371								0.98
	Mean	SE	Mean	SE	Mean	SE			Mean	SE	Mean	SE	Mean	SE			Mean	SE	Mean	SE	Mean	SE			Mean	SE	Mean	SE	Mean	SE			Test of interaction between response indicator and treatment
Mean % Hispanic	10.9838	0.218792	11.5684	0.249778	8.05411	0.390971	3.51426		10.9855	0.374931	11.6365	0.435123	7.96901	0.605396	3.66746		10.884	0.372543	11.4883	0.423465	7.81459	0.685802	3.67374		11.082	0.38936	11.5813	0.439279	8.40127	0.749592	3.17999
Difference	3.51426								3.66746								3.67374								3.17998								F( 2, 5994) = 0.08
t-test (unequal variances)	7.5747								3.7497								3.6672								2.9771								Prob > F = 0.9268
2-sided p-value	0								0.0002								0.0003								0.0029
	Mean	SE	Mean	SE	Mean	SE			Mean	SE	Mean	SE	Mean	SE			Mean	SE	Mean	SE	Mean	SE			Mean	SE	Mean	SE	Mean	SE			Test of interaction between response indicator and treatment
Mean % Black	12.1073	0.261136	12.4766	0.289836	10.2565	0.592267	2.2201		12.259	0.465622	12.8438	0.525412	9.5493	0.965078	3.29447		11.9185	0.448945	12.164	0.494354	10.6717	1.06855	1.49224		12.1445	0.442211	12.4282	0.486522	10.621	1.05066	1.80721
Difference	2.2201								3.29447								1.49224								1.80721								F( 2, 5994) = 0.65
t-test (unequal variances)	3.3669								2.7077								1.2324								1.4872								Prob > F = 0.5244
2-sided p-value	0.0008								0.0068								0.2179								0.1371
	Mean	SE	Mean	SE	Mean	SE			Mean	SE	Mean	SE	Mean	SE			Mean	SE	Mean	SE	Mean	SE			Mean	SE	Mean	SE	Mean	SE			Test of interaction between response indicator and treatment
Mean % Asian	4.01267	0.0997083	4.11695	0.111115	3.48998	0.221155	0.626973		3.948	0.169115	4.02918	0.190614	3.57183	0.357049	0.457348		4.095	0.174164	4.25075	0.196047	3.30395	0.357238	0.946797		3.995	0.174834	4.06999	0.190678	3.59236	0.438012	0.477631
Difference	0.626973								0.457348								0.946797								0.477631								F( 2, 5994) = 0.36
t-test (unequal variances)	2.5332								1.0333								2.0169								0.9939								Prob > F = 0.7007
2-sided p-value	0.0114								0.3016								0.0438								0.3204
	Mean	SE	Mean	SE	Mean	SE			Mean	SE	Mean	SE	Mean	SE			Mean	SE	Mean	SE	Mean	SE			Mean	SE	Mean	SE	Mean	SE			Test of interaction between response indicator and treatment
Mean % White	77.2413	0.30147	76.4954	0.334776	80.98	0.673244	4.48456		77.0855	0.529259	76.1769	0.594168	81.2958	1.11952	5.11887		77.36	0.521826	76.6212	0.578496	81.1125	1.17597	4.49128		77.2785	0.515551	76.6815	0.56742	80.4841	1.21102	3.80259
Difference	-4.48456								-5.11888								-4.49128								-3.80258								F( 2, 5994) = 0.22
t-test (unequal variances)	-5.9644								-3.7073								-3.1982								-2.6875								Prob > F = 0.8013
2-sided p-value	0								0.0002								0.0014								0.0073
	Mean	SE	Mean	SE	Mean	SE			Mean	SE	Mean	SE	Mean	SE			Mean	SE	Mean	SE	Mean	SE			Mean	SE	Mean	SE	Mean	SE			Test of interaction between response indicator and treatment
Mean Median Income	59407.4	340.062	58865.7	372.189	62122.8	831.782	3257.16		59349.5	582.74	58590.8	631.033	62865	1480.45	4274.18		59841.8	599.812	59361	659.597	62283.4	1434.12	2922.36		59031	584.466	58642.8	642.733	61115.4	1392.24	2472.63
Difference	-3257.16								-4274.18								-2922.36								-2472.63								F( 2, 5994) = 0.36
t-test (unequal variances)	-3.5744								-2.8073								-1.8073								-1.5396								Prob > F = 0.6992
2-sided p-value	0.0004								0.005								0.0709								0.1238
Average absolute difference percentages							0.012714								0.0168711								0.0195162								0.0175971
Average absolute difference mean % race category							2.71147								3.13454								2.65101								2.31685
